# Supplementary material for: Substrate stiffness controls proinflammatory responses in human gingival fibroblasts
Source: PubMed Central journal article supplement (PMC9873657; doi:10.1038/s41598-023-28541-z), 2023-01-24

Fig 4B: p-YAP 397

| hGF-M2 cells     |      |     |      |
|------------------|------|-----|------|
| Poly-<br>styrene | PDMS |     |      |
|                  | Soft | Mid | Hard |

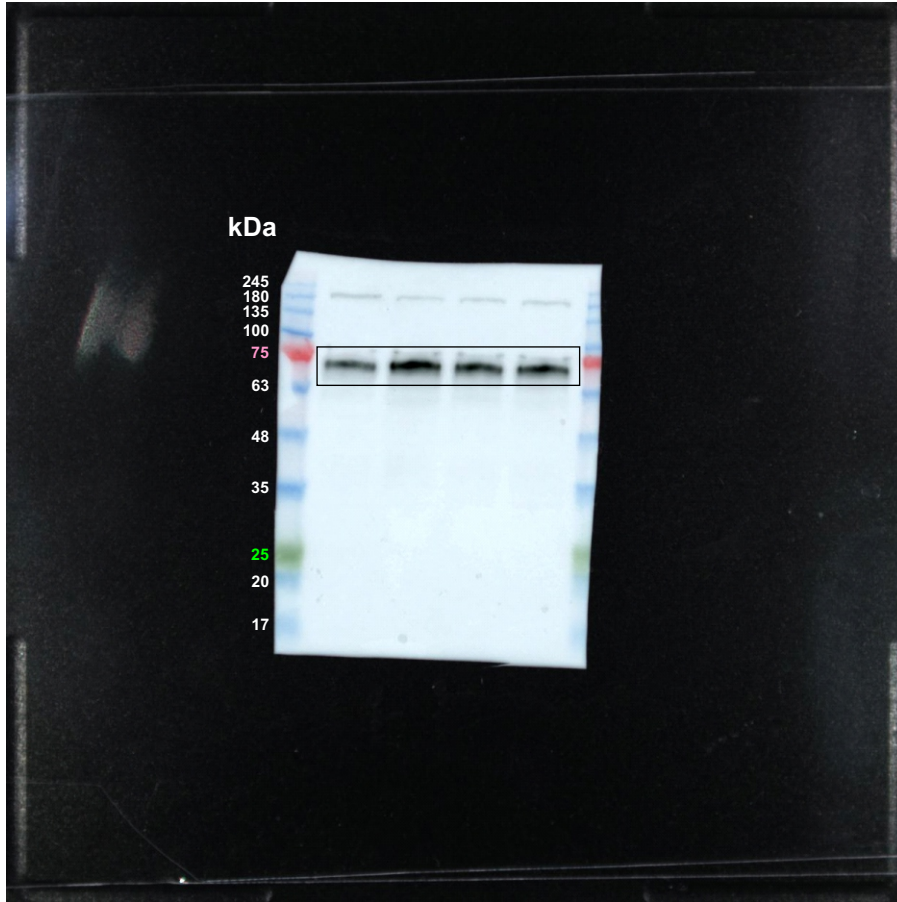

Fig. 4B: p-YAP 127

|                  |              |     |      |
|------------------|--------------|-----|------|
|                  | hGF-M2 cells |     |      |
| Poly-<br>styrene | PDMS         |     |      |
|                  | Soft         | Mid | Hard |

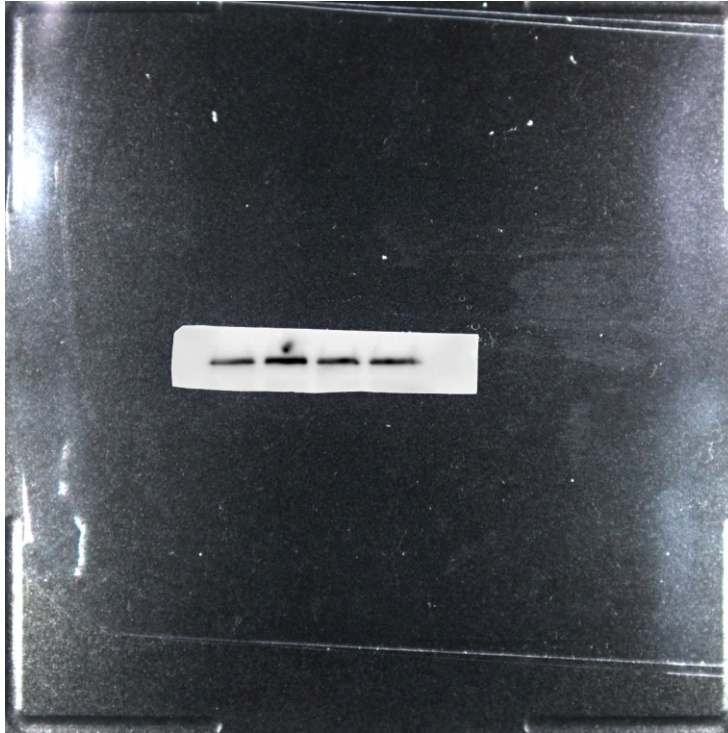

Fig. 4B: active-YAP

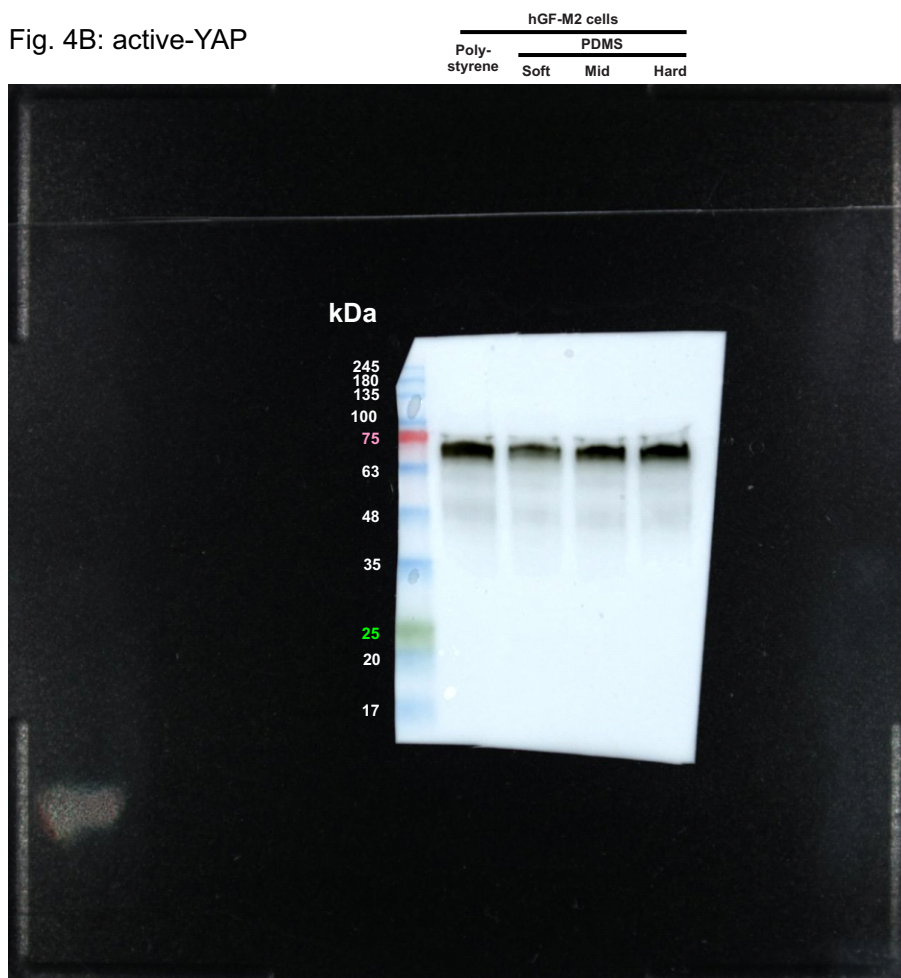

Fig 4B: total-YAP

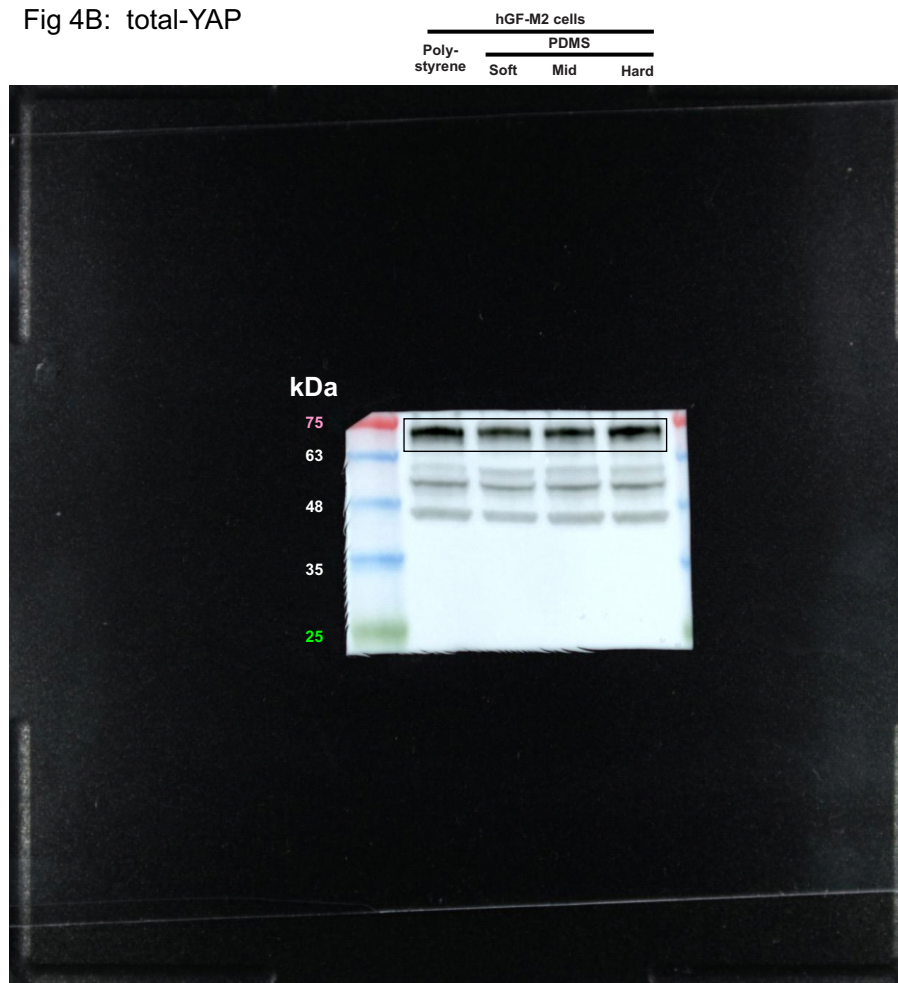

Fig. 4B: GAPDH

| hGF-M2 cells     |      |     |      |
|------------------|------|-----|------|
| Poly-<br>styrene | PDMS |     |      |
|                  | Soft | Mid | Hard |

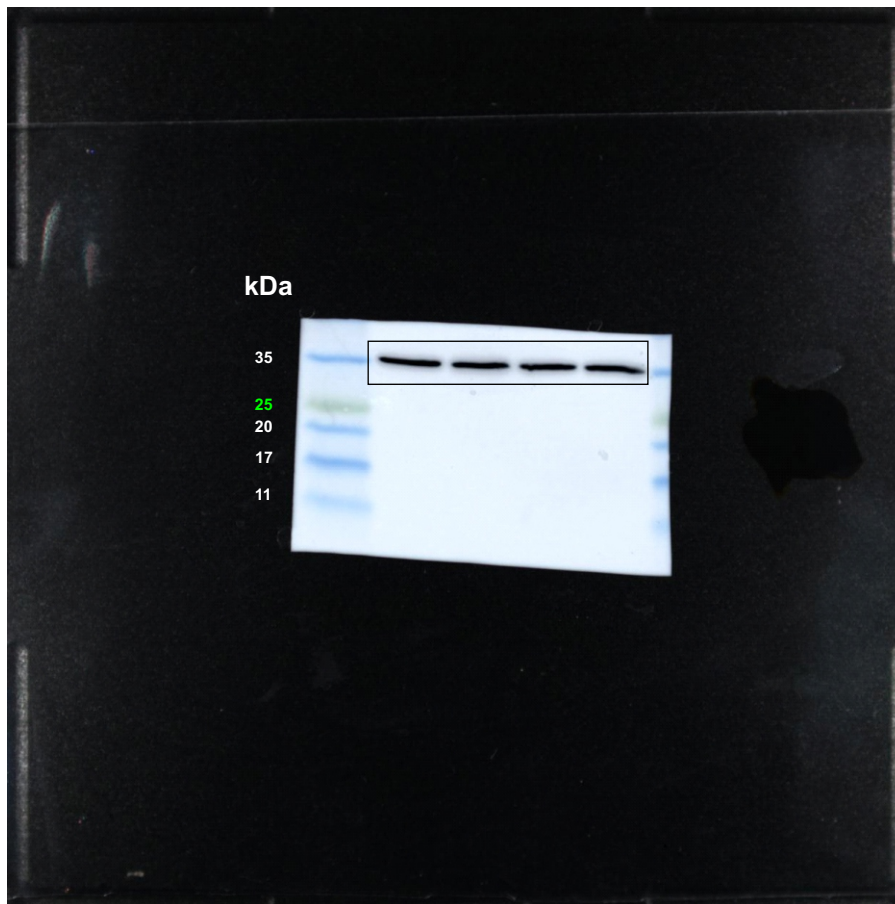

Fig. 4C: p-NF-kB

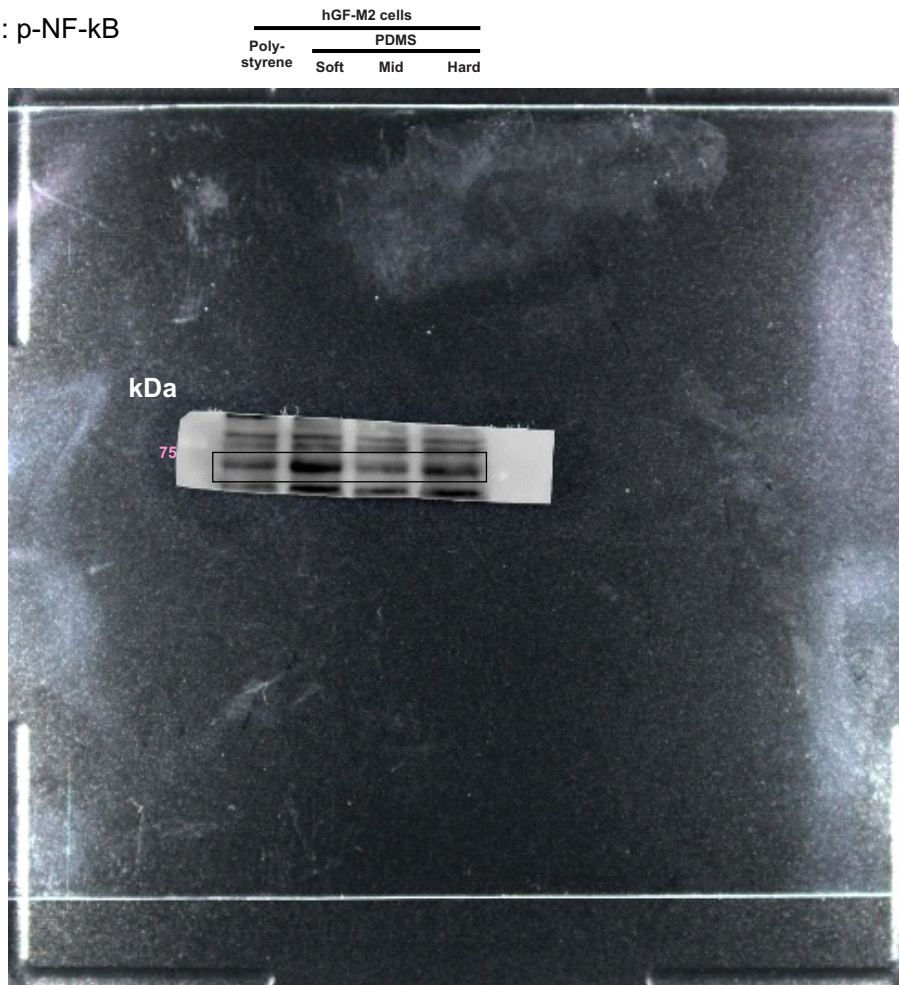

Fig. 4C: Total-NF-kB

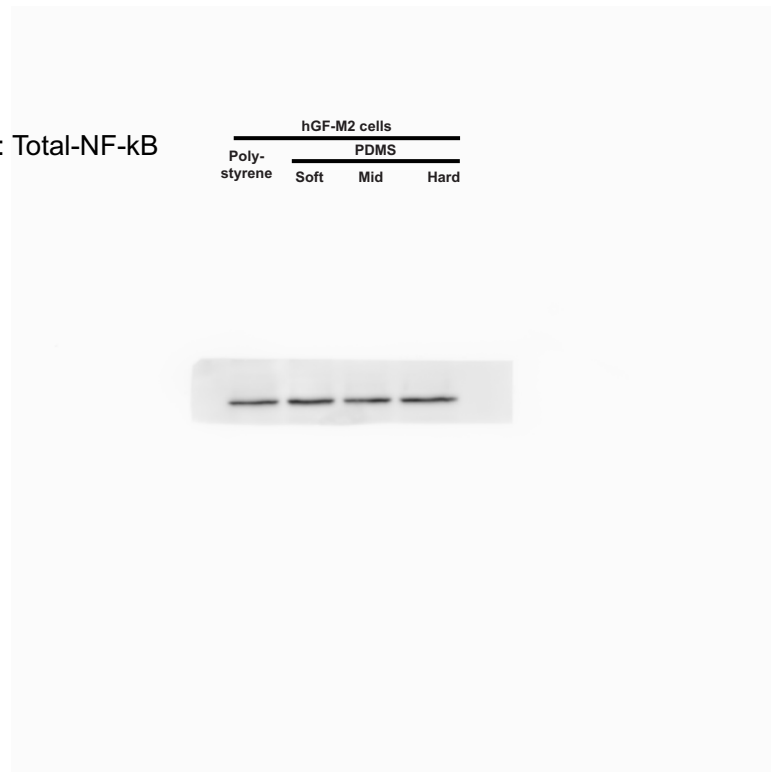

Fig. 4C: GAPDH

| Poly-<br>styrene | hGF-M2 cells |     |      |
|------------------|--------------|-----|------|
|                  | PDMS         |     |      |
|                  | Soft         | Mid | Hard |

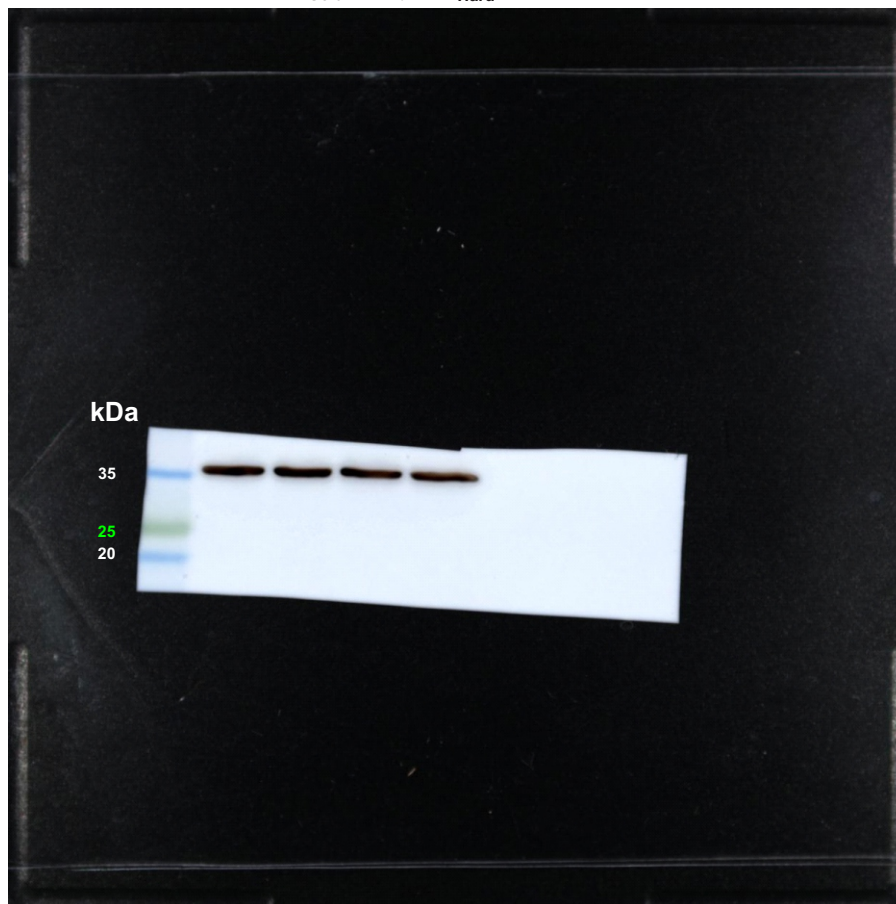



Fig. 4D: p-NF-kB (+LPS)

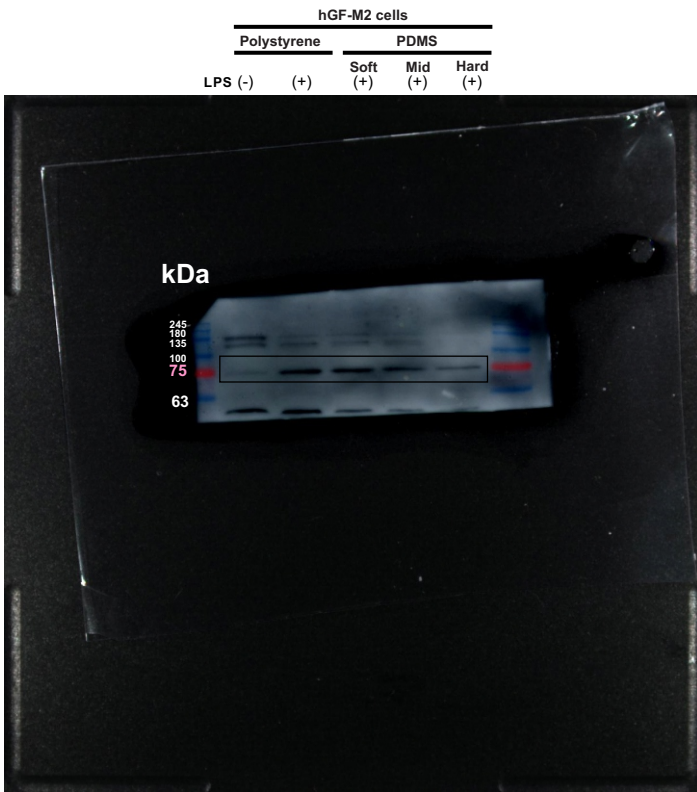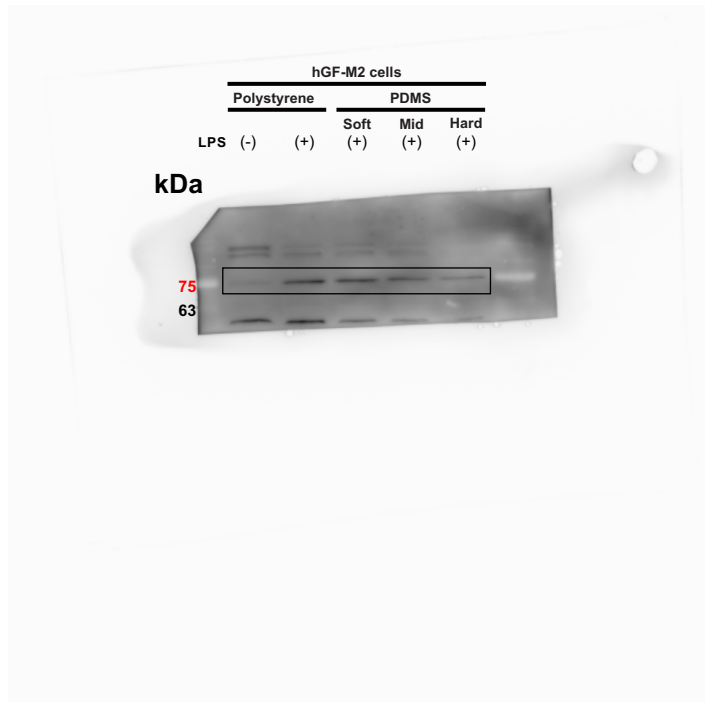

Fig. 4D: Total-NF- $\kappa$ B +LPS

|     |     | hGF-M2 cells |          |         |          |
|-----|-----|--------------|----------|---------|----------|
|     |     | Polystyrene  | PDMS     |         |          |
| LPS | (-) | (+)          | Soft (+) | Mid (+) | Hard (+) |
|     |     |              |          |         |          |

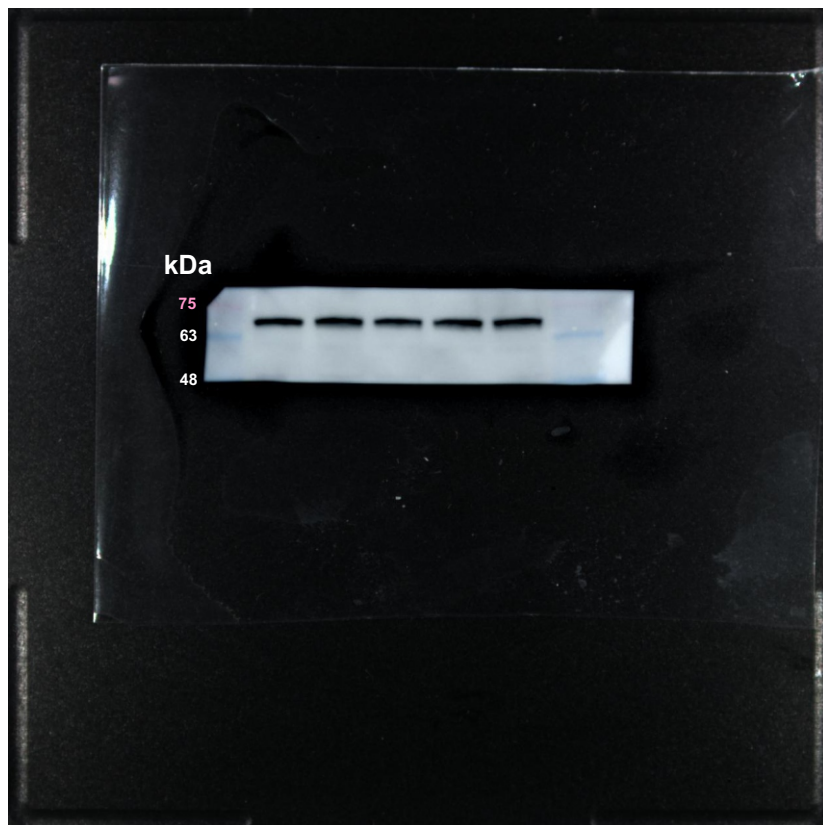

Fig. 6G: TLR-4

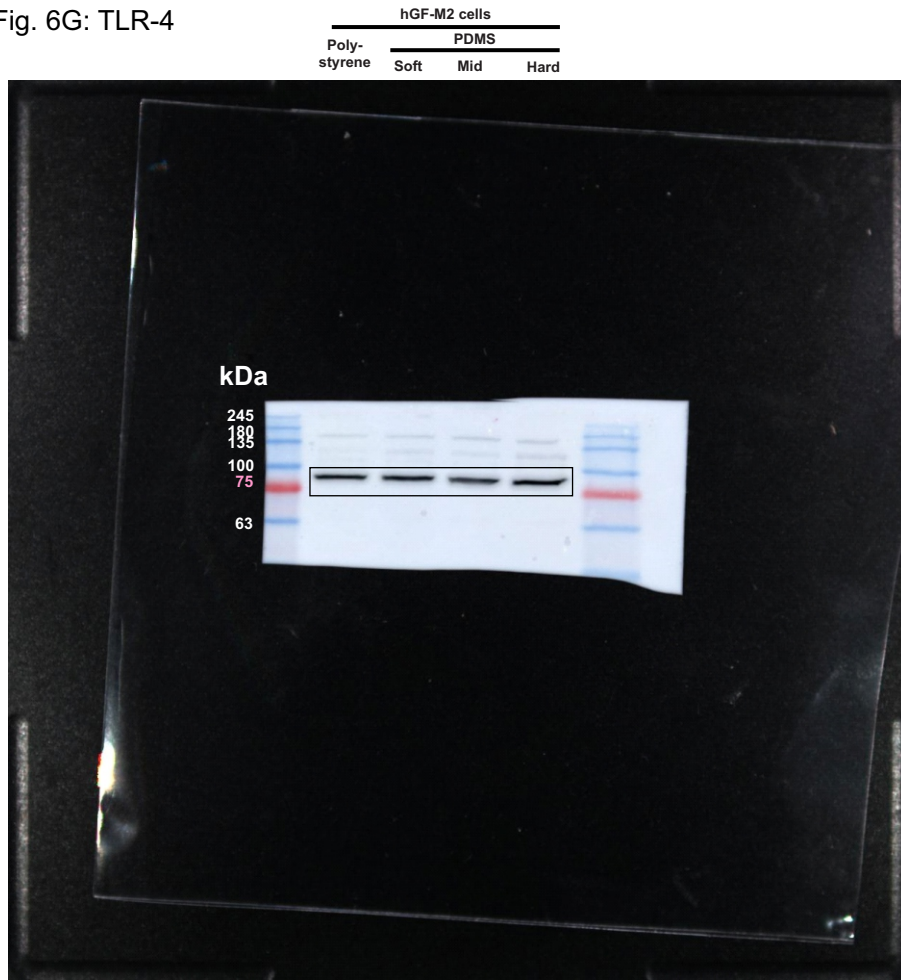

Fig. 4D&6H: GAPDH +LPS

|             |     | hGF-M2 cells |         |          |
|-------------|-----|--------------|---------|----------|
| Polystyrene |     | PDMS         |         |          |
| LPS         | (-) | Soft (+)     | Mid (+) | Hard (+) |
|             | (+) |              |         |          |

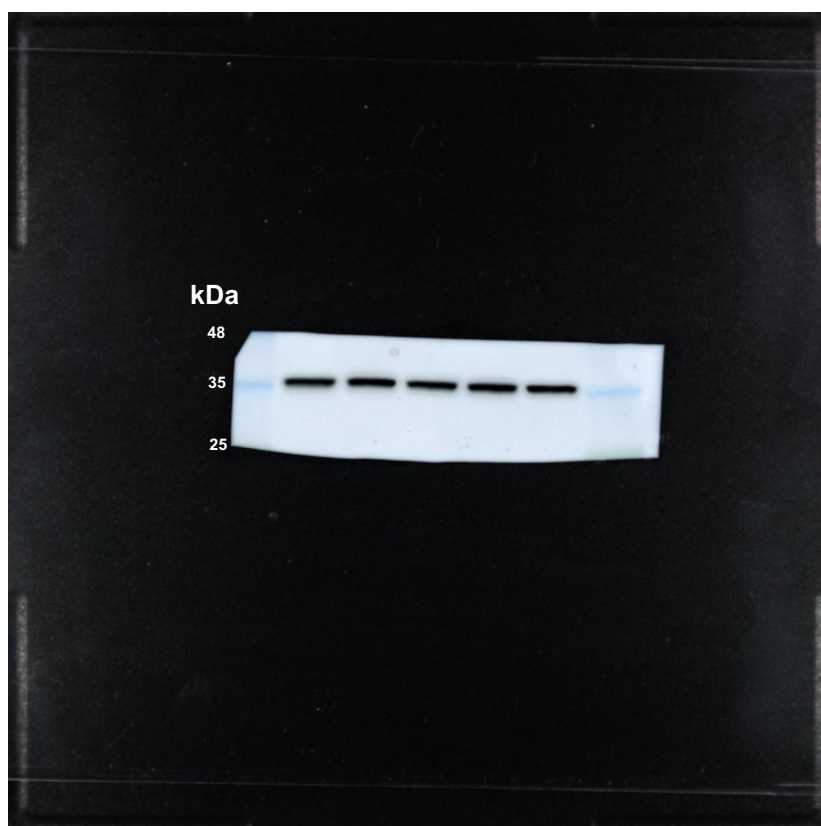

Fig. 6G: GAPDH

|              |              |     |      |
|--------------|--------------|-----|------|
|              | hGF-M2 cells |     |      |
|              | PDMS         |     |      |
| Poly-styrene | Soft         | Mid | Hard |

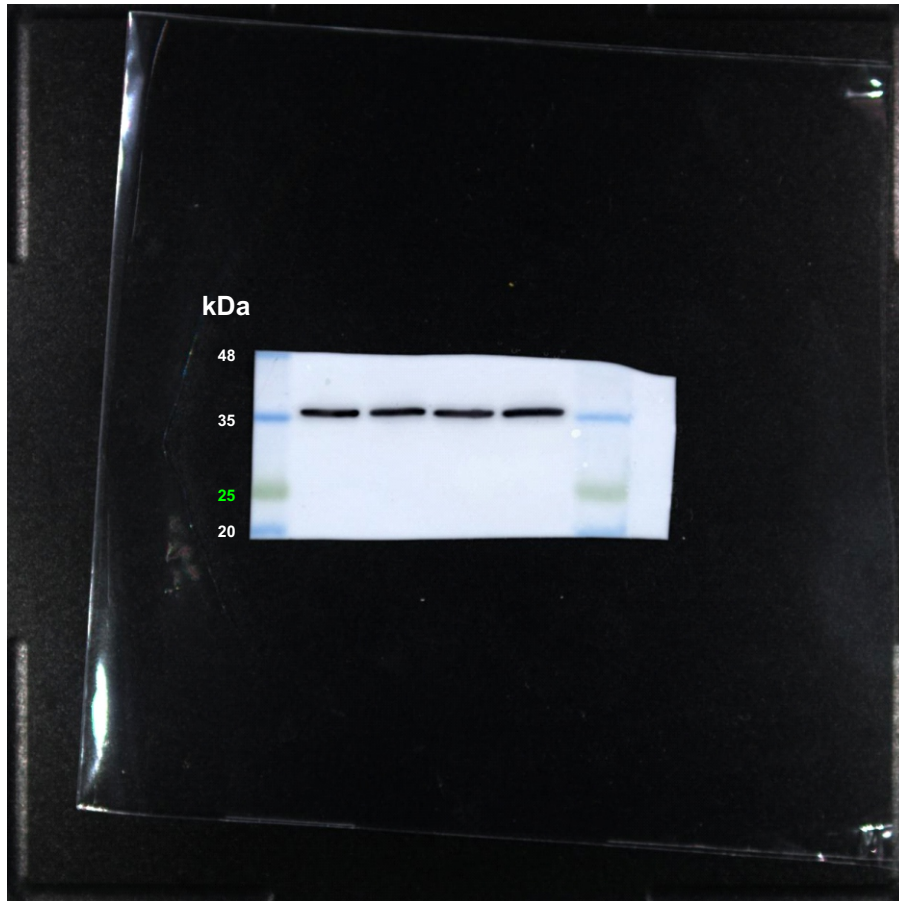

Fig. 6H: TLR-4 (+LPS)

|             |     | hGF-M2 cells |         |          |
|-------------|-----|--------------|---------|----------|
| Polystyrene |     | PDMS         |         |          |
| LPS         | (-) | Soft (+)     | Mid (+) | Hard (+) |

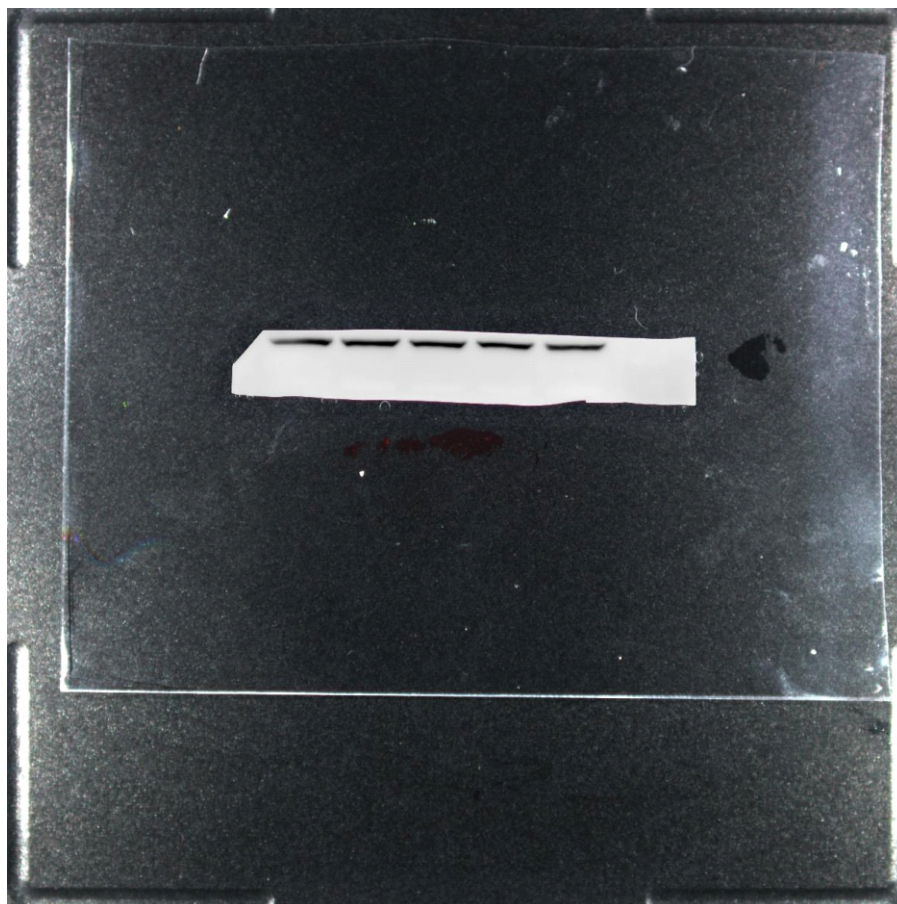

Supplement: 41598_2023_28541_MOESM2_ESM.pdf [file 41598_2023_28541_MOESM2_ESM.pdf]
